# Supplementary material
Source: MDPI journal article supplement (https://www.mdpi.com/2313-0105/9/1/26)
Supplement: s1 [file s1]

## Supporting Information

### The Stabilizing of 1T-MoS<sub>2</sub> for All-Solid-State Lithium-ion Batteries

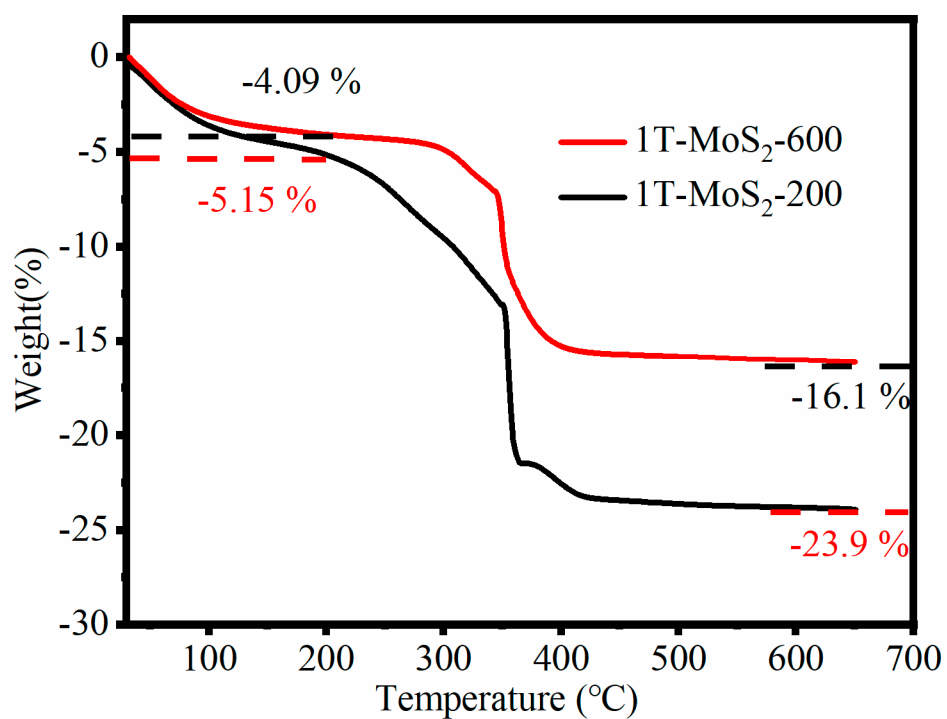

**Figure S1.** TG curves of 1T-MoS<sub>2</sub>-600 and 1T-MoS<sub>2</sub>-200.

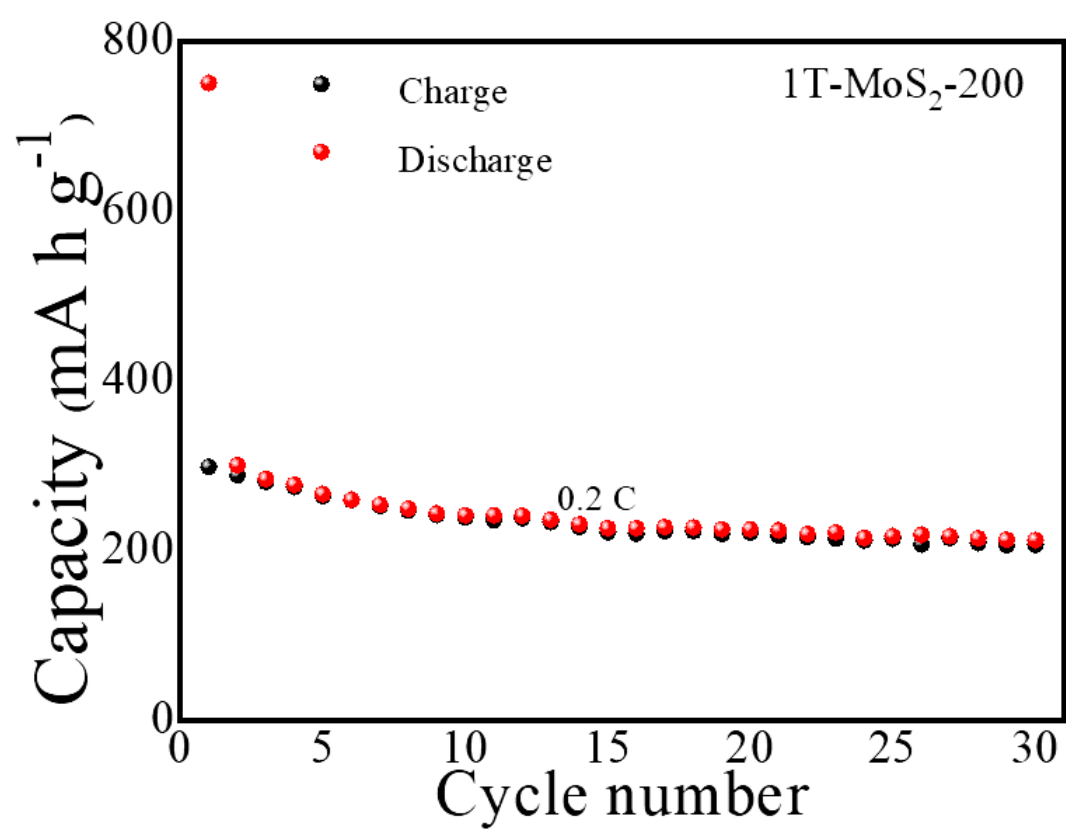

**Figure S2.** Cycling performance of 1T-MoS<sub>2</sub>-200 at 0.2C.

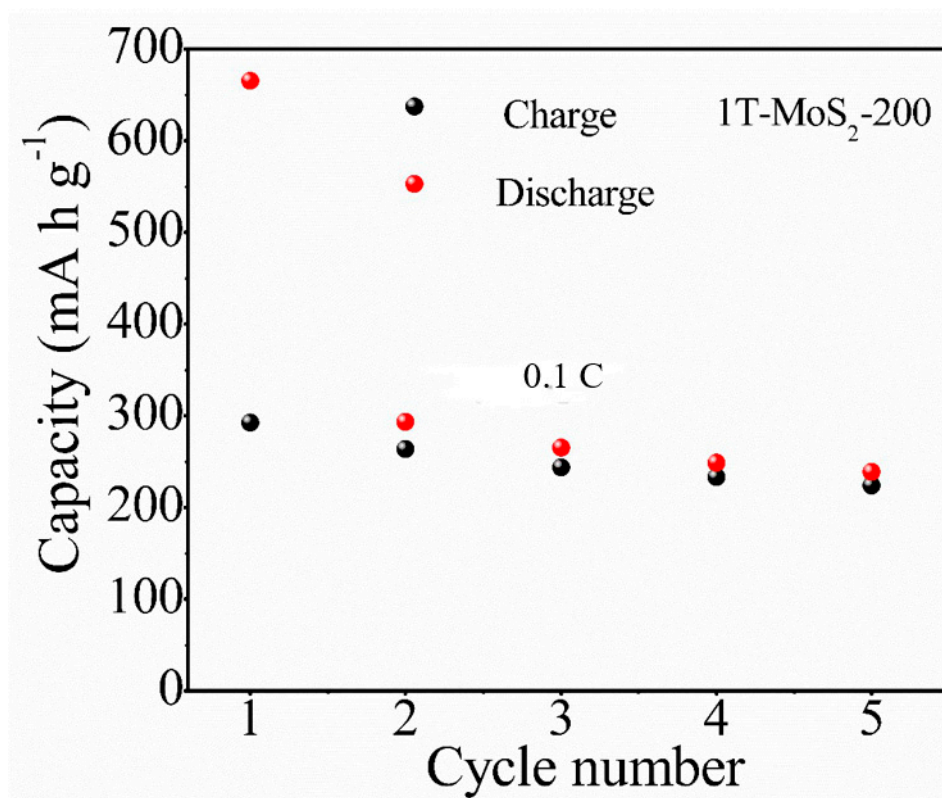

**Figure S3.** Cycling performance of 1T-MoS<sub>2</sub>-200 at 0.1C.
